# Supplementary figures and images for: Safety and efficacy of genetic MECP2 supplementation in the R294X mouse model of Rett syndrome
Source: PubMed Central journal article supplement — Genes Brain Behav. 2021 May 19;21(1):e12739. doi: 10.1111/gbb.12739 (PMC8563491; doi:10.1111/gbb.12739), 2021-05-19

**(A)** ♂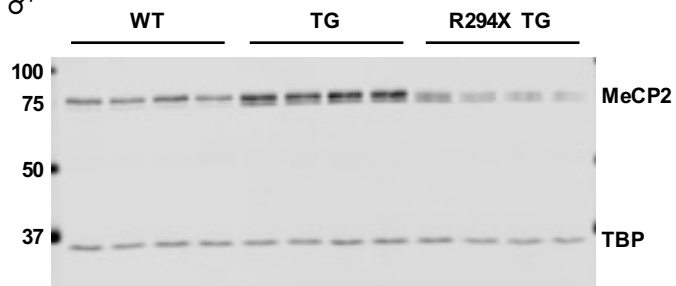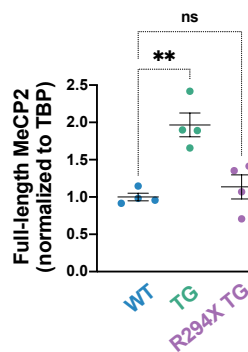**(B)** ♀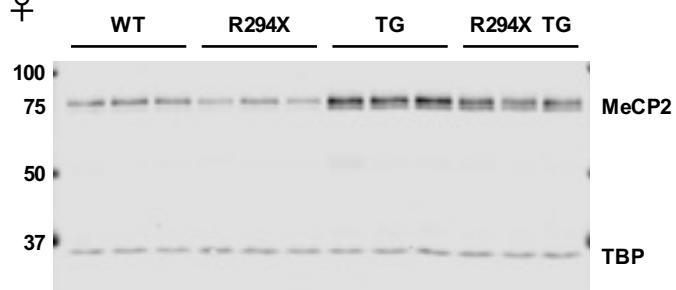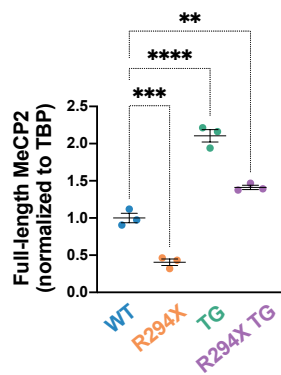**(C)** ♂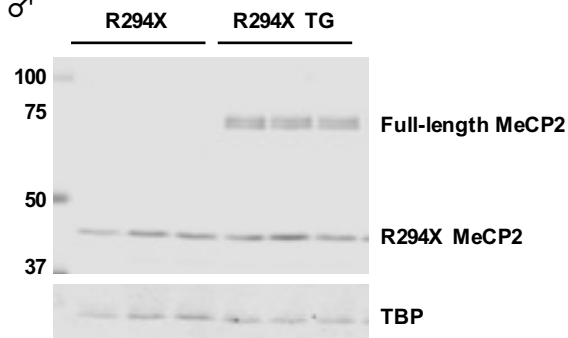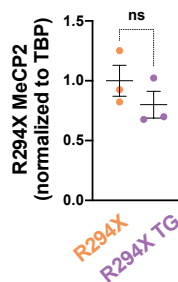**(D)** ♀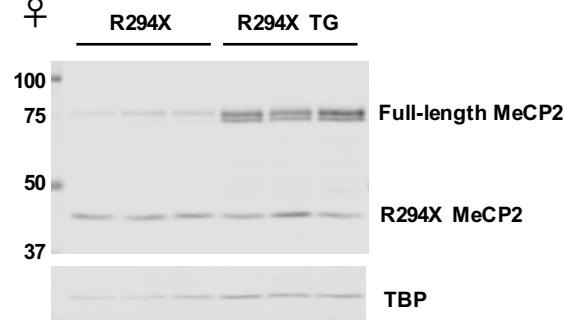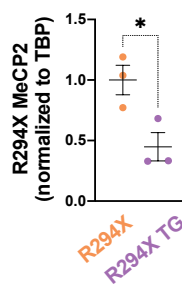

Supplement: NIHMS1702446-supplement-sm1.pdf [file NIHMS1702446-supplement-sm1.pdf]

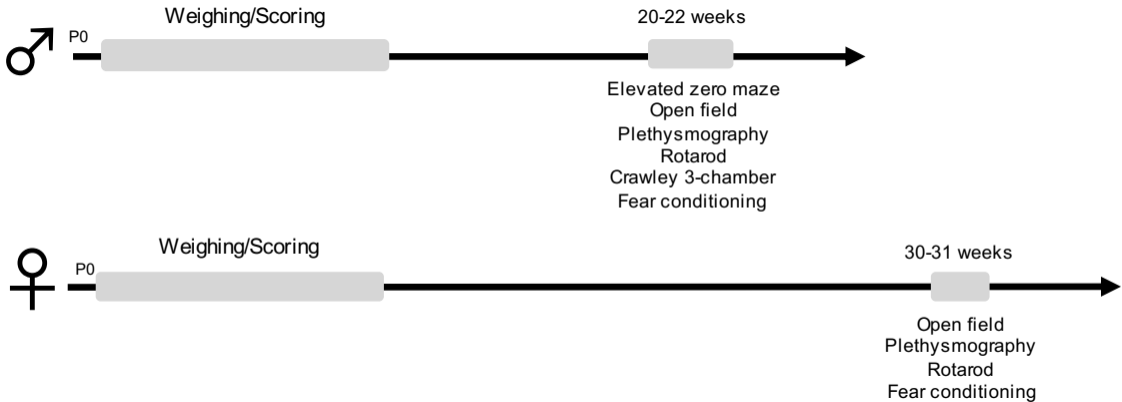

Supplement: NIHMS1702446-supplement-sm2.pdf [file NIHMS1702446-supplement-sm2.pdf]

WT

R294X

TG

R294X TG

(A)

♂

% Distance in center

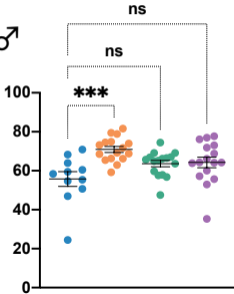

(B)

♀

% Distance in center

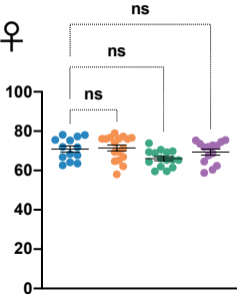

Supplement: NIHMS1702446-supplement-sm3.pdf [file NIHMS1702446-supplement-sm3.pdf]

WT ♂

R294X ♂

TG ♂

R294X TG ♂

(A)

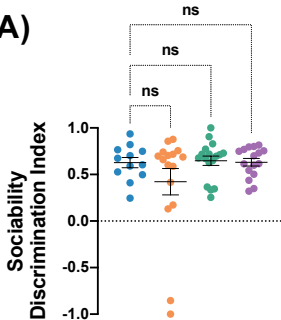

(B)

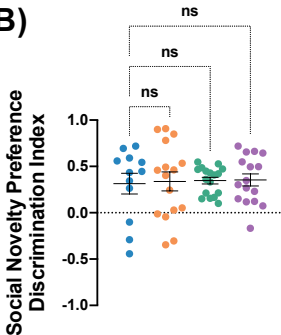

Supplement: NIHMS1702446-supplement-sm4.pdf [file NIHMS1702446-supplement-sm4.pdf]
